# Supplementary material
Source: publisher figshare collection journal article supplement (https://acs.figshare.com/ndownloader/files/7935154)
Supplement: Supplementary file 1 [file 7935154]

***First Evidence of  $\text{CH}_3\text{NH}_3\text{PbI}_3$  Optical Constant Improvement in  $\text{N}_2$  Environment in the Range 40-80°C***

*Giovanni Mannino<sup>1</sup>, Alessandra Alberti<sup>1\*</sup>, Ioannis Deretzis<sup>1</sup>, Emanuele Smecca<sup>1</sup>, Salvatore Sanzaro<sup>1</sup>, Youhei Numata,<sup>2</sup> Tsutomu Miyasaka<sup>2</sup> and Antonino La Magna<sup>1</sup>*

<sup>1</sup>*CNR-IMM Zona Industriale, Strada VIII 5, 95121, Catania, Italy*

<sup>2</sup>*Graduate School of Engineering, Toin University of Yokohama, 1614, Kuroganecho, Aoba, Yokohama 225-8503, Japan*

SUPPORTING INFORMATION

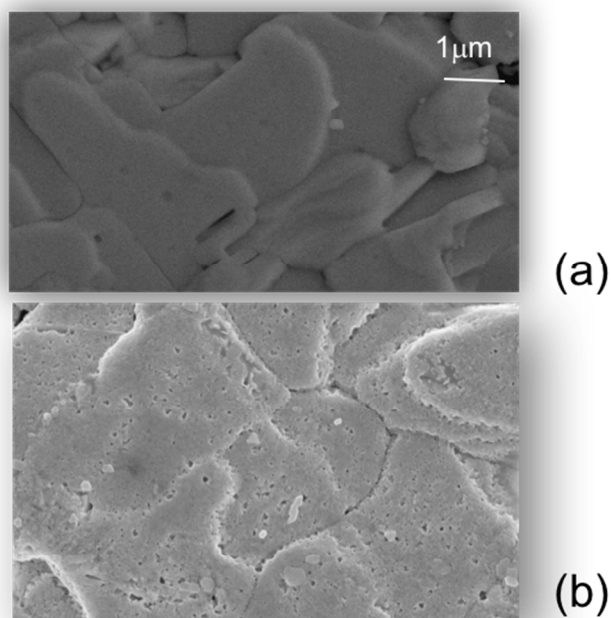

*Fig. S1: Scanning electron microscopy. (a) The starting sample is made of large grains with flat surfaces; (b) leaving the sample in air causes the grains surface to be damaged by holes and roughening.*

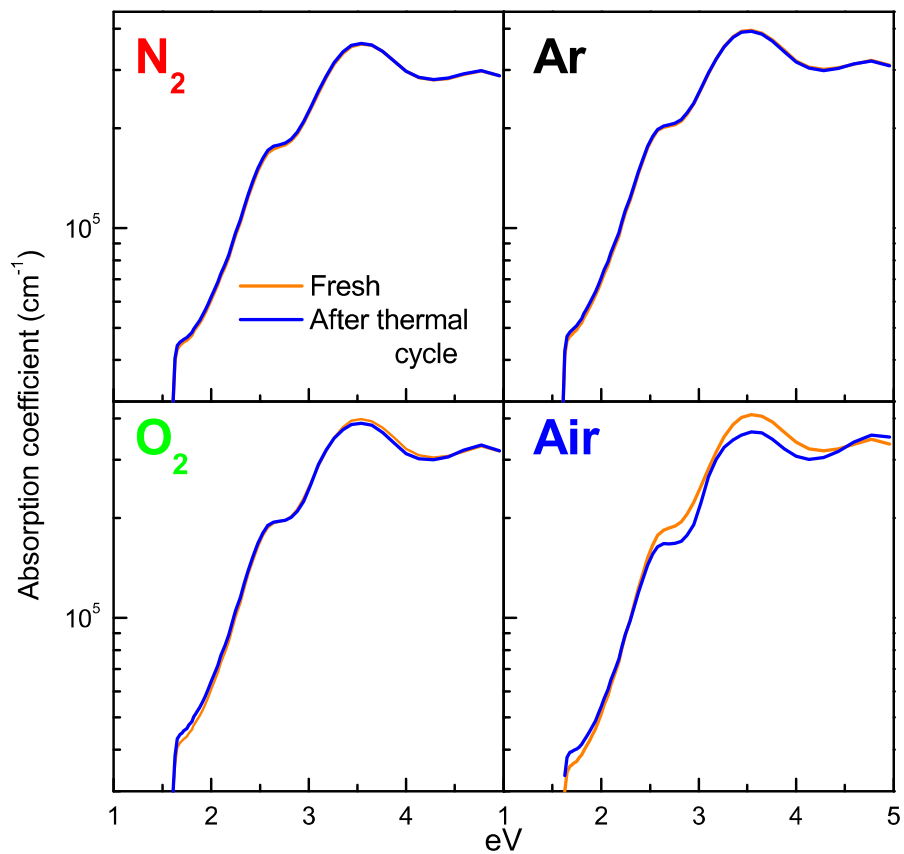

*Fig. S2: The absorption coefficients as calculated from Eq. 1 in the text at the end of the thermal cycle (5days) reported in Fig. 1a for all environments.*
